# Supplementary figures and images for: Effects of the New Dual PPARα/δ Agonist GFT505 on Lipid and Glucose Homeostasis in Abdominally Obese Patients With Combined Dyslipidemia or Impaired Glucose Metabolism
Source: Oxford University Press journal article supplement (doi:10.2337/dc11-0093), 2011-08-05

**Supplementary Figure 1.**

**Study 1. Combined Dyslipidemia**

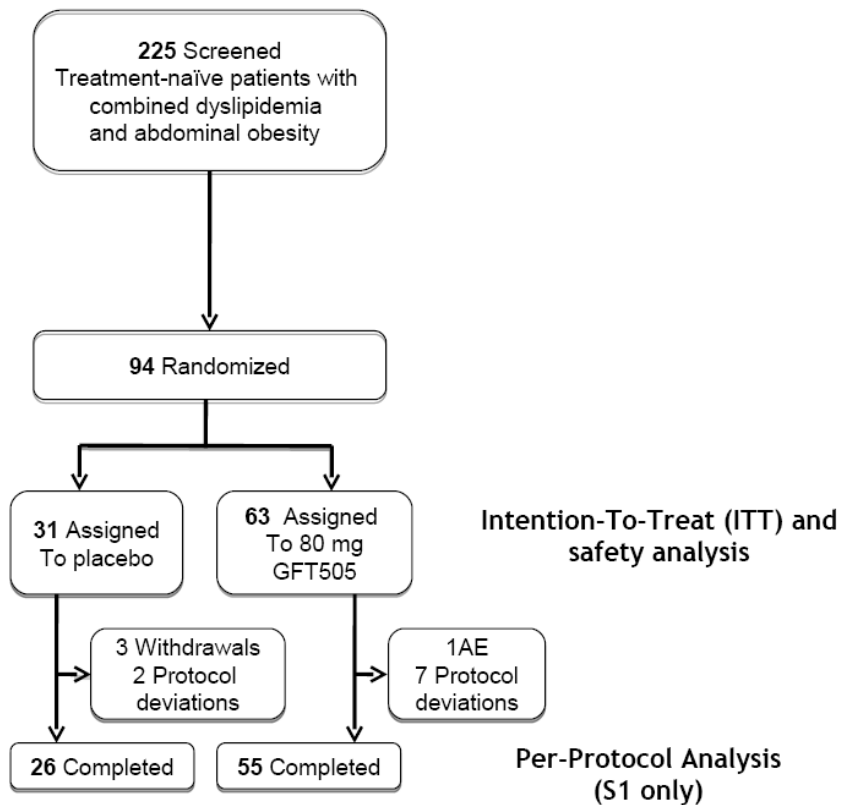

**Study 2. Pre-diabetes**

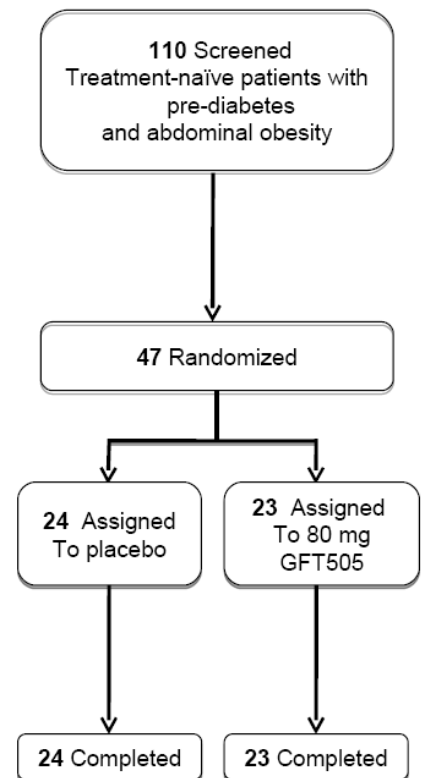

Supplement: dc110093supplementarydata.pdf [file dc110093supplementarydata.pdf]
